# Supplementary material for: Dynamics of Fusarium Mycotoxins and Lytic Enzymes during Pea Plants’ Infection
Source: MDPI journal article supplement (doi:10.3390/ijms22189888), 2021-09-13
Supplement: s1 [file s1]

**Table S1.** Mean and standard error (SE) of protease activity obtained from soil and roots of Sokolik and Santana infected with PEA1, PEA2, 34 OX, 1757 OX and control. \*Statistically significant (p<0.05).

|                 |         | Day 1 |       | Day 3 |       | day 5 |       | Day 7 |       | Day 9 |       |
|-----------------|---------|-------|-------|-------|-------|-------|-------|-------|-------|-------|-------|
|                 |         | Soil  | Roots |
| Sokolik Control | (U/min) | 0.06  | 0.06  | 0.06  | 0.06  | 0.06  | 0.06  | 0.06  | 0.06  | 0.07  | 0.06  |
|                 | SE      | 0.00  | 0.00  | 0.00  | 0.00  | 0.00  | 0.00  | 0.00  | 0.00  | 0.00  | 0.00  |
| Santana Control | (U/min) | 0.07  | 0.06  | 0.09  | 0.06  | 0.07  | 0.06  | 0.10  | 0.08  | 0.08  | 0.06  |
|                 | SE      | 0.00  | 0.01  | 0.00  | 0.00  | 0.00  | 0.00  | 0.01  | 0.00  | 0.01  | 0.00  |
| Sokolik+PEA1    | (U/min) | 0.06  | 0.07  | 0.06  | 0.07  | 0.06  | 0.06  | 0.06  | 0.06  | 0.06  | 0.06  |
|                 | SE      | 0.00  | 0.00  | 0.00  | 0.00  | 0.00  | 0.00  | 0.00  | 0.00  | 0.00  | 0.00  |
| Santana+PEA1    | (U/min) | 0.07  | 0.07  | 0.07* | 0.07  | 0.07  | 0.07  | 0.06* | 0.06* | 0.07  | 0.07* |
|                 | SE      | 0.00  | 0.00  | 0.00  | 0.02  | 0.00  | 0.00  | 0.00  | 0.00  | 0.00  | 0.00  |
| Sokolik+PEA2    | (U/min) | 0.06  | 0.06  | 0.09  | 0.06  | 0.07  | 0.06  | 0.06  | 0.06  | 0.08  | 0.06  |
|                 | SE      | 0.00  | 0.00  | 0.03  | 0.00  | 0.00  | 0.00  | 0.00  | 0.00  | 0.01  | 0.00  |
| Santana+PEA2    | (U/min) | 0.07  | 0.06  | 0.08* | 0.06  | 0.07  | 0.07  | 0.07* | 0.06* | 0.07  | 0.06  |
|                 | SE      | 0.00  | 0.01  | 0.00  | 0.00  | 0.00  | 0.00  | 0.00  | 0.00  | 0.00  | 0.00  |
| Sokolik+34OX    | (U/min) | 0.07* | 0.07  | 0.08  | 0.07  | 0.08* | 0.07  | 0.06  | 0.11* | 0.07  | 0.06  |
|                 | SE      | 0.00  | 0.01  | 0.00  | 0.01  | 0.00  | 0.01  | 0.00  | 0.00  | 0.00  | 0.00  |
| Santana+34OX    | (U/min) | 0.09  | 0.06  | 0.09  | 0.07  | 0.09* | 0.06  | 0.07* | 0.11* | 0.08  | 0.07* |
|                 | SE      | 0.01  | 0.00  | 0.01  | 0.02  | 0.01  | 0.00  | 0.00  | 0.00  | 0.00  | 0.00  |
| Sokolik+1757OX  | (U/min) | 0.08* | 0.06  | 0.10* | 0.08  | 0.10* | 0.07  | 0.06  | 0.06  | 0.08  | 0.06  |
|                 | SE      | 0.00  | 0.01  | 0.01  | 0.01  | 0.01  | 0.01  | 0.00  | 0.00  | 0.00  | 0.00  |
| Santana+1757OX  | (U/min) | 0.06* | 0.06  | 0.08  | 0.06  | 0.07  | 0.06  | 0.07  | 0.07  | 0.08  | 0.07  |
|                 | SE      | 0.00  | 0.00  | 0.00  | 0.00  | 0.00  | 0.01  | 0.00  | 0.00  | 0.00  | 0.00  |

**Table S2.** Mean and standard error (SE) of polygalacturonase activity obtained from soil and roots of Sokolik and Santana infected with PEA1, PEA2, 34 OX, 1757 OX and control. \*Statistically significant (p<0.05).

|                 |         | Day 1 |       | Day 3 |       | day 5 |       | Day 7 |       | Day 9 |       |
|-----------------|---------|-------|-------|-------|-------|-------|-------|-------|-------|-------|-------|
|                 |         | Soil  | Roots |
| Sokolik Control | (U/min) | 1.12  | 0.44  | 0.75  | 1.36  | 0.70  | 0.75  | 0.99  | 1.24  | 1.12  | 1.36  |
|                 | SE      | 0.58  | 0.21  | 0.27  | 0.65  | 0.37  | 0.40  | 0.28  | 0.12  | 0.27  | 0.65  |
| Santana Control | (U/min) | 0.63  | 1.85  | 0.32  | 1.67  | 0.38  | 0.32  | 0.69  | 0.81  | 0.81  | 1.54  |
|                 | SE      | 0.28  | 0.06  | 0.22  | 0.06  | 0.12  | 0.06  | 0.37  | 0.18  | 0.11  | 0.32  |
| Sokolik+PEA1    | (U/min) | 1.93  | 0.20  | 0.93  | 0.20  | 2.22* | 0.07  | 1.48  | 1.24  | 1.24  | 0.99  |
|                 | SE      | 1.40  | 0.12  | 0.40  | 0.12  | 0.27  | 0.06  | 0.43  | 0.16  | 0.06  | 0.18  |
| Santana+PEA1    | (U/min) | 0.44  | 0.20* | 0.69  | 1.05  | 1.05  | 0.38  | 1.97  | 0.87  | 1.36  | 1.12  |
|                 | SE      | 0.11  | 0.06  | 0.34  | 0.27  | 0.27  | 0.06  | 0.27  | 0.32  | 0.93  | 0.06  |
| Sokolik+PEA2    | (U/min) | 1.55  | 0.38  | 0.63  | 0.26  | 0.56  | 1.12  | 0.75  | 1.30  | 1.36  | 0.81  |
|                 | SE      | 0.56  | 0.06  | 0.21  | 0.00  | 0.40  | 0.58  | 0.12  | 0.31  | 0.37  | 0.11  |
| Santana+PEA2    | (U/min) | 0.50  | 0.93  | 0.44  | 0.81* | 0.44  | 0.81* | 1.48  | 1.30  | 1.12  | 1.18  |
|                 | SE      | 0.22  | 0.50  | 0.11  | 0.18  | 0.21  | 0.18  | 0.62  | 0.27  | 0.32  | 0.11  |
| Sokolik+34OX    | (U/min) | 2.77  | 0.63  | 0.07  | 0.63  | 0.56  | 0.99  | 1.42  | 1.24  | 1.42  | 2.01  |
|                 | SE      | 0.25  | 0.18  | 0.28  | 0.32  | 0.22  | 0.49  | 0.32  | 0.16  | 0.16  | 0.94  |
| Santana+34OX    | (U/min) | 0.38  | 0.26* | 0.44  | 1.67  | 0.26  | 0.87* | 1.05  | 1.54  | 1.97  | 1.05  |
|                 | SE      | 0.12  | 0.11  | 0.37  | 0.12  | 0.11  | 0.06  | 0.12  | 0.11  | 0.64  | 0.16  |
| Sokolik+1757OX  | (U/min) | 0.38  | 0.44  | 0.44  | 2.16  | 0.39  | 2.22  | 1.79  | 1.81  | 2.10* | 0.93  |
|                 | SE      | 0.12  | 0.21  | 0.11  | 0.16  | 0.06  | 0.37  | 0.43  | 0.93  | 0.28  | 0.25  |
| Santana+1757OX  | (U/min) | 0.56  | 0.01* | 0.99  | 0.75* | 0.63  | 0.32  | 1.05  | 1.05  | 1.30  | 1.85  |
|                 | SE      | 0.27  | 0.00  | 0.32  | 0.06  | 0.21  | 0.06  | 0.25  | 0.32  | 0.44  | 0.64  |

**Table S3.** Mean and standard error (SE) of chitinase activity obtained from soil and roots of Sokolik and Santana infected with PEA1, PEA2, 34 OX, 1757 OX and control. \*Statistically significant (p<0.05).

|                 |         | Day 1 |       | Day 3 |        | day 5 |        | Day 7 |       | Day 9 |       |
|-----------------|---------|-------|-------|-------|--------|-------|--------|-------|-------|-------|-------|
|                 |         | Soil  | Roots | Soil  | Roots  | Soil  | Roots  | Soil  | Roots | Soil  | Roots |
| Sokolik Control | (U/min) | 3.91  | 9.23  | 5.56  | 9.91   | 4.09  | 9.03   | 6.29  | 9.39  | 4.00  | 8.68  |
|                 | SE      | 0.39  | 0.80  | 1.19  | 0.66   | 0.39  | 0.38   | 1.82  | 0.49  | 0.41  | 1.11  |
| Santana Control | (U/min) | 4.09  | 10.54 | 5.44  | 11.28  | 5.39  | 10.84  | 5.23  | 10.00 | 5.69  | 6.76  |
|                 | SE      | 0.39  | 0.81  | 0.34  | 2.11   | 1.26  | 0.41   | 0.83  | 8.36  | 0.26  | 0.31  |
| Sokolik+PEA1    | (U/min) | 4.71  | 8.32  | 3.91  | 10.32  | 5.48  | 9.10   | 4.18  | 11.76 | 6.04  | 8.53  |
|                 | SE      | 0.24  | 0.44  | 0.09  | 0.71   | 0.74  | 0.47   | 0.24  | 1.56  | 1.25  | 0.69  |
| Santana+PEA1    | (U/min) | 5.37  | 9.32  | 4.09  | 15.73* | 4.09  | 9.67   | 4.85  | 9.32  | 4.43  | 8.82* |
|                 | SE      | 1.44  | 0.38  | 0.49  | 0.31   | 0.18  | 0.43   | 0.51  | 0.43  | 0.57  | 0.40  |
| Sokolik+PEA2    | (U/min) | 4.78  | 7.96  | 4.27  | 10.06  | 3.91  | 11.89  | 3.91  | 7.89  | 4.25  | 6.97  |
|                 | SE      | 0.92  | 0.47  | 0.53  | 0.89   | 0.39  | 0.62   | 0.24  | 0.85  | 0.65  | 0.36  |
| Santana+PEA2    | (U/min) | 5.46  | 9.19  | 5.19  | 10.45  | 3.56  | 10.72  | 4.53  | 10.53 | 3.56  | 9.66* |
|                 | SE      | 0.21  | 1.41  | 0.50  | 0.12   | 0.18  | 0.48   | 0.41  | 0.47  | 0.09  | 0.59  |
| Sokolik+34OX    | (U/min) | 5.16  | 11.80 | 3.56  | 11.07  | 4.62  | 10.16  | 4.53  | 9.66  | 3.56  | 7.47  |
|                 | SE      | 0.64  | 2.05  | 0.71  | 1.28   | 0.24  | 0.87   | 0.00  | 1.26  | 0.36  | 0.12  |
| Santana+34OX    | (U/min) | 5.56  | 9.62  | 8.39* | 16.75* | 6.15  | 10.81  | 4.00  | 12.89 | 5.62  | 7.54  |
|                 | SE      | 0.67  | 0.77  | 0.62  | 0.41   | 1.65  | 1.56   | 0.31  | 0.87  | 0.68  | 0.51  |
| Sokolik+1757OX  | (U/min) | 5.26  | 10.17 | 6.72  | 15.23* | 5.19  | 24.68* | 4.53  | 9.24  | 4.52  | 7.25  |
|                 | SE      | 1.01  | 0.07  | 1.55  | 0.90   | 0.39  | 7.42   | 0.15  | 0.61  | 0.60  | 1.05  |
| Santana+1757OX  | (U/min) | 4.87  | 8.53  | 5.48  | 10.19  | 5.65  | 9.75   | 6.40  | 16.33 | 5.85  | 9.88* |
|                 | SE      | 0.87  | 0.54  | 0.63  | 0.65   | 1.13  | 1.00   | 0.54  | 2.38  | 0.94  | 0.31  |

**Table S4.** Mean and standard error (SE) of endo  $\beta$ - 1,4- glucanase activity obtained from soil and roots of Sokolik and Santana infected with PEA1, PEA2, 34 OX, 1757 OX and control. \*Statistically significant (p<0.05).

|                 |         | Day 1 |       | Day 3 |       | day 5 |       | Day 7 |       | Day 9 |       |
|-----------------|---------|-------|-------|-------|-------|-------|-------|-------|-------|-------|-------|
|                 |         | Soil  | Roots |
| Sokolik Control | (U/min) | 6.96  | 2.54  | 6.65  | 8.20  | 5.09  | 5.91  | 2.04  | 4.11  | 1.98  | 6.94  |
|                 | SE      | 1.01  | 1.33  | 0.66  | 1.18  | 0.58  | 0.95  | 0.38  | 0.87  | 1.04  | 0.66  |
| Santana Control | (U/min) | 7.90  | 7.32  | 6.15  | 5.45  | 4.99  | 3.07  | 6.35  | 5.97  | 3.89  | 5.25  |
|                 | SE      | 0.78  | 0.24  | 0.52  | 1.21  | 0.42  | 1.63  | 0.71  | 0.37  | 0.07  | 0.31  |
| Sokolik+PEA1    | (U/min) | 5.06  | 5.88* | 6.31  | 6.02  | 5.58  | 6.71  | 3.72  | 8.12* | 5.22  | 7.42  |
|                 | SE      | 1.28  | 0.11  | 1.24  | 1.40  | 1.21  | 0.45  | 0.52  | 1.18  | 0.04  | 1.36  |
| Santana+PEA1    | (U/min) | 4.74  | 1.73  | 2.32  | 8.29  | 5.92  | 6.15  | 3.66  | 6.25  | 4.76  | 8.18  |
|                 | SE      | 0.56  | 1.73  | 1.29  | 0.84  | 1.24  | 0.26  | 0.76  | 0.20  | 0.40  | 1.26  |
| Sokolik+PEA2    | (U/min) | 6.67  | 5.11  | 6.62  | 7.59  | 8.70  | 6.83  | 4.15  | 7.78* | 4.11  | 7.38  |
|                 | SE      | 1.15  | 0.80  | 0.73  | 1.02  | 1.13  | 0.92  | 0.68  | 1.25  | 0.82  | 0.15  |
| Santana+PEA2    | (U/min) | 4.51  | 5.37  | 3.18  | 6.42  | 5.75  | 5.15  | 0.00* | 4.57  | 0.14  | 5.59  |
|                 | SE      | 0.38  | 0.80  | 1.59  | 0.42  | 0.27  | 2.60  | 0.00  | 1.68  | 0.14  | 2.20  |
| Sokolik+34OX    | (U/min) | 6.10  | 4.96  | 5.53  | 7.87  | 5.83  | 7.05  | 5.85* | 5.56  | 1.73  | 4.87  |
|                 | SE      | 0.68  | 0.54  | 0.10  | 0.99  | 0.40  | 0.94  | 0.85  | 0.86  | 0.89  | 1.33  |
| Santana+34OX    | (U/min) | 6.77  | 4.90  | 7.28  | 8.90  | 6.60  | 6.96  | 4.99  | 6.66  | 4.95  | 2.65  |
|                 | SE      | 0.74  | 0.97  | 1.23  | 0.84  | 0.36  | 1.03  | 0.37  | 0.92  | 0.69  | 0.51  |
| Sokolik+1757OX  | (U/min) | 7.21  | 6.04* | 6.34  | 8.44  | 6.00  | 6.55  | 3.33  | 9.53* | 5.05  | 5.71  |
|                 | SE      | 0.48  | 0.29  | 0.31  | 0.37  | 0.58  | 0.81  | 0.56  | 0.30  | 1.00  | 0.73  |
| Santana+1757OX  | (U/min) | 7.33  | 6.76  | 5.20  | 6.63  | 6.82  | 2.62  | 7.40  | 5.97  | 5.08  | 7.02  |
|                 | SE      | 0.69  | 0.30  | 0.58  | 1.09  | 0.71  | 1.59  | 0.90  | 0.52  | 0.69  | 0.86  |

**Table S5.** Mean and standard error (SE) of exo  $\beta$ -1,4- glucanase (avicelase) activity obtained from soil and roots of Sokolik and Santana infected with PEA1, PEA2, 34 OX, 1757 OX and control. \*Statistically significant (p<0.05).

|                 |         | Day 1 |        | Day 3 |        | day 5  |       | Day 7  |       | Day 9  |       |
|-----------------|---------|-------|--------|-------|--------|--------|-------|--------|-------|--------|-------|
|                 |         | Soil  | Roots  | Soil  | Roots  | Soil   | Roots | Soil   | Roots | Soil   | Roots |
| Sokolik Control | (U/min) | 31.87 | 22.59  | 25.85 | 38.85  | 26.60  | 34.18 | 37.80  | 33.95 | 37.24  | 38.60 |
|                 | SE      | 0.50  | 1.99   | 3.70  | 1.40   | 2.51   | 3.74  | 1.00   | 5.17  | 3.56   | 1.91  |
| Santana Control | (U/min) | 35.82 | 39.77  | 22.09 | 42.76  | 28.36  | 35.52 | 22.84  | 45.87 | 35.17  | 34.38 |
|                 | SE      | 3.20  | 4.20   | 5.26  | 2.46   | 3.08   | 2.09  | 4.81   | 2.13  | 2.50   | 2.23  |
| Sokolik+PEA1    | (U/min) | 3.88* | 36.79* | 22.34 | 39.07  | 16.03  | 39.73 | 34.82  | 31.12 | 38.08  | 33.55 |
|                 | SE      | 2.49  | 2.23   | 1.76  | 0.35   | 2.65   | 0.35  | 3.86   | 3.94  | 1.58   | 4.58  |
| Santana+PEA1    | (U/min) | 35.39 | 34.52  | 31.12 | 38.94  | 32.88  | 33.63 | 22.84  | 34.40 | 40.53  | 37.40 |
|                 | SE      | 1.57  | 2.31   | 2.23  | 3.87   | 0.50   | 2.23  | 1.65   | 4.05  | 0.74   | 0.50  |
| Sokolik+PEA2    | (U/min) | 26.76 | 26.10  | 26.60 | 36.14  | 25.85  | 37.21 | 32.63  | 34.89 | 35.57  | 33.63 |
|                 | SE      | 9.42  | 1.33   | 2.01  | 1.15   | 2.01   | 2.21  | 5.02   | 1.25  | 2.82   | 2.14  |
| Santana+PEA2    | (U/min) | 33.76 | 36.17  | 21.08 | 32.63* | 34.57  | 38.46 | 38.58* | 45.24 | 34.38  | 33.51 |
|                 | SE      | 4.47  | 2.44   | 6.40  | 1.33   | 8.63   | 1.63  | 1.33   | 5.69  | 1.65   | 2.68  |
| Sokolik+34OX    | (U/min) | 29.36 | 32.63* | 24.35 | 29.36  | 25.76  | 33.53 | 26.35* | 35.18 | 31.37  | 36.07 |
|                 | SE      | 0.00  | 2.89   | 3.80  | 5.34   | 7.32   | 4.45  | 1.30   | 2.94  | 0.50   | 3.77  |
| Santana+34OX    | (U/min) | 29.62 | 36.31  | 21.33 | 43.07  | 43.38* | 34.96 | 40.67* | 42.27 | 30.38  | 39.13 |
|                 | SE      | 2.89  | 2.15   | 0.25  | 0.87   | 2.51   | 3.77  | 1.14   | 0.13  | 4.41   | 1.96  |
| Sokolik+1757OX  | (U/min) | 13.94 | 35.14* | 22.09 | 45.38  | 29.87  | 41.08 | 38.16  | 32.88 | 30.67  | 26.03 |
|                 | SE      | 4.48  | 1.00   | 2.62  | 1.30   | 3.90   | 7.62  | 0.52   | 2.19  | 5.14   | 8.26  |
| San-tana+1757OX | (U/min) | 31.62 | 25.60* | 33.03 | 37.95  | 21.58  | 40.06 | 28.36  | 40.80 | 21.58* | 38.21 |
|                 | SE      | 3.86  | 1.51   | 3.29  | 1.67   | 0.90   | 3.17  | 3.90   | 1.06  | 2.79   | 1.92  |

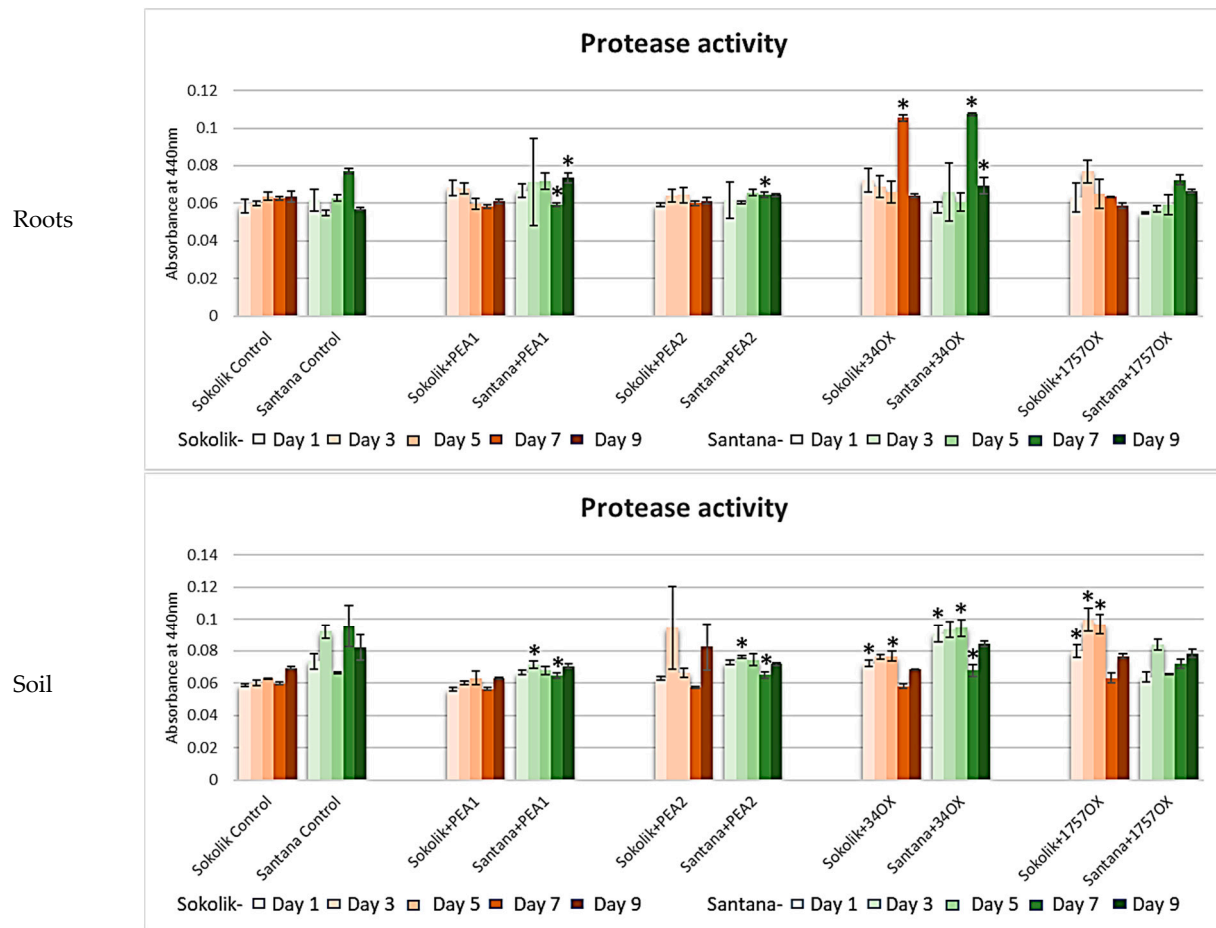

**Figure S1.** Protease activity obtained from roots and soil of Sokolik and Santana infected with PEA1, PEA2, 34 OX, 1757 OX and control. Error bar represents standard error. \*Statistically significant ( $p < 0.05$ ).

Roots

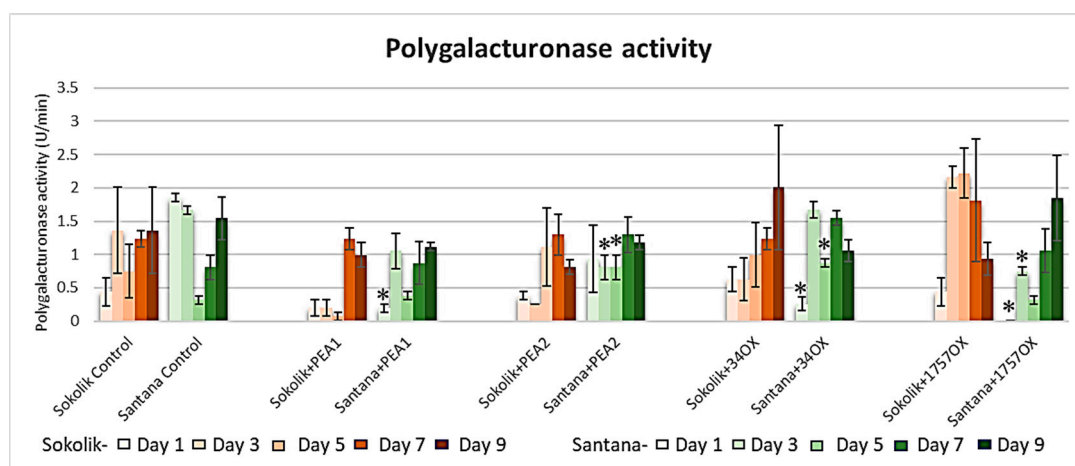

Soil

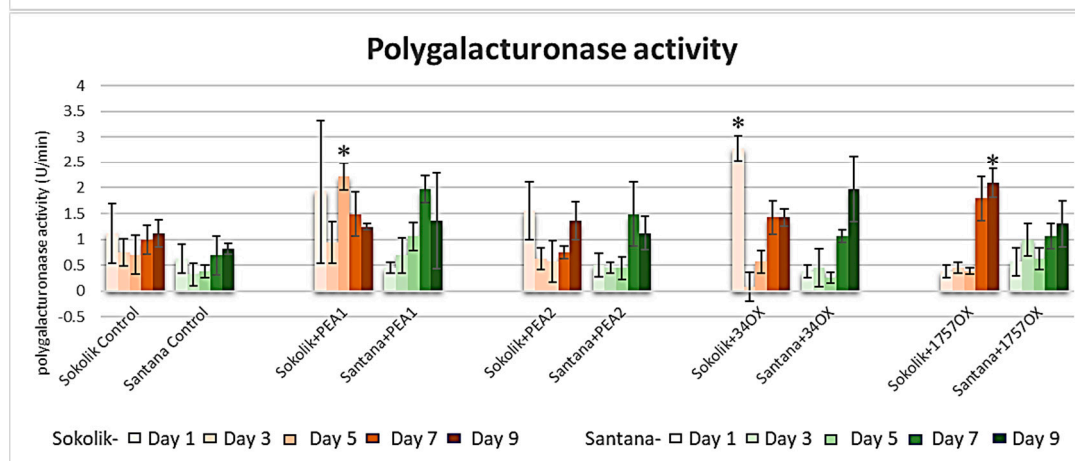

**Figure S2.** Polygalacturonase activity obtained from roots and soil of Sokolik and Santana infected with PEA1, PEA2, 34 OX, 1757 OX and control. Error bar represents standard error. \*Statistically significant ( $p < 0.05$ ).

Roots

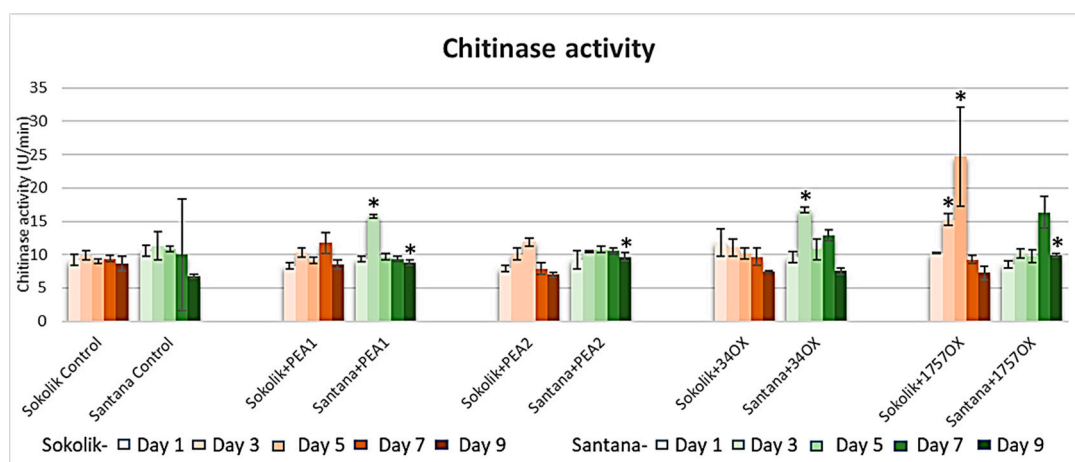

Soil

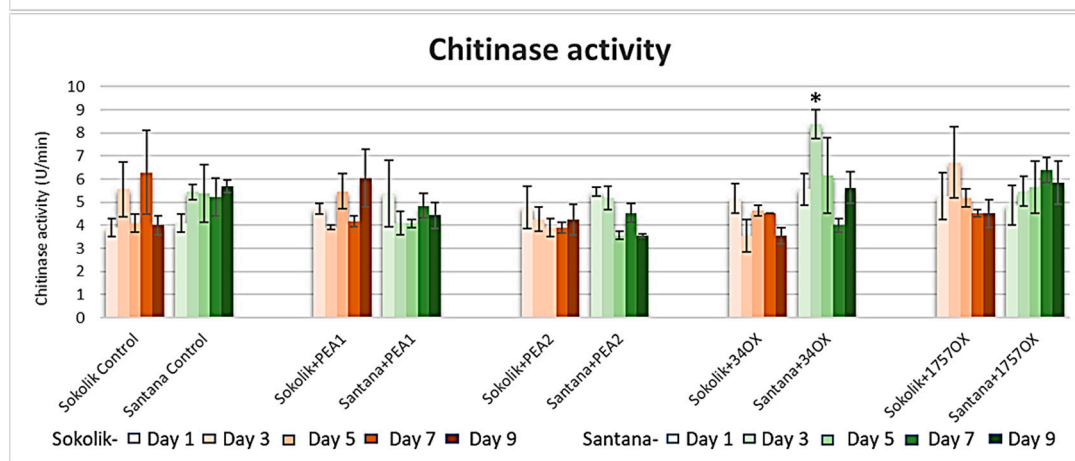

**Figure S3.** Chitinase activity obtained from roots and soil of Sokolik and Santana infected with PEA1, PEA2, 34 OX, 1757 OX and control. Error bar represents standard error. \*Statistically significant ( $p < 0.05$ ).

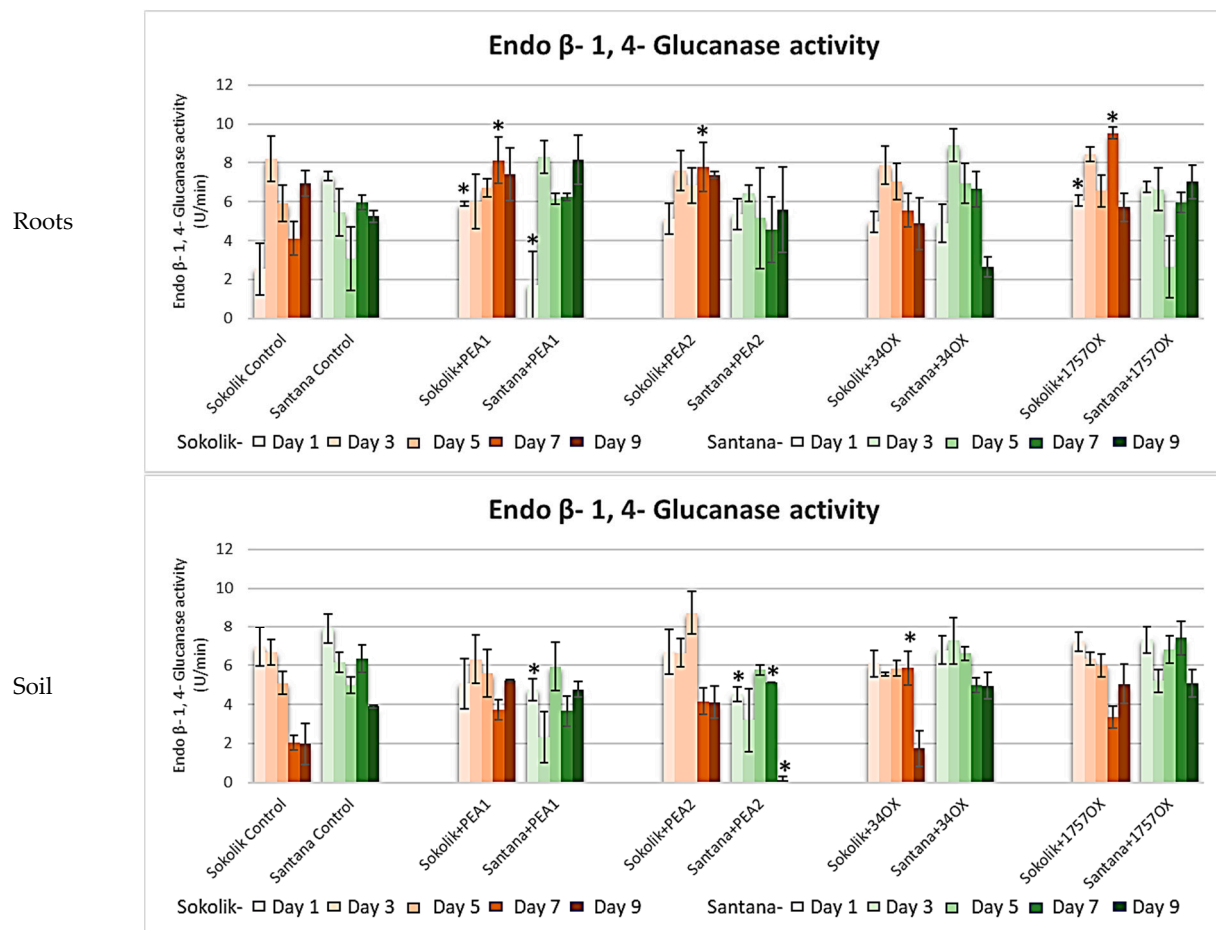

**Figure S4.** Endo  $\beta$ -1, 4-glucanase activity obtained from roots and soil of Sokolik and Santana infected with PEA1, PEA2, 34 OX, 1757 OX and control. Error bar represents standard error. \*Statistically significant ( $p < 0.05$ ).

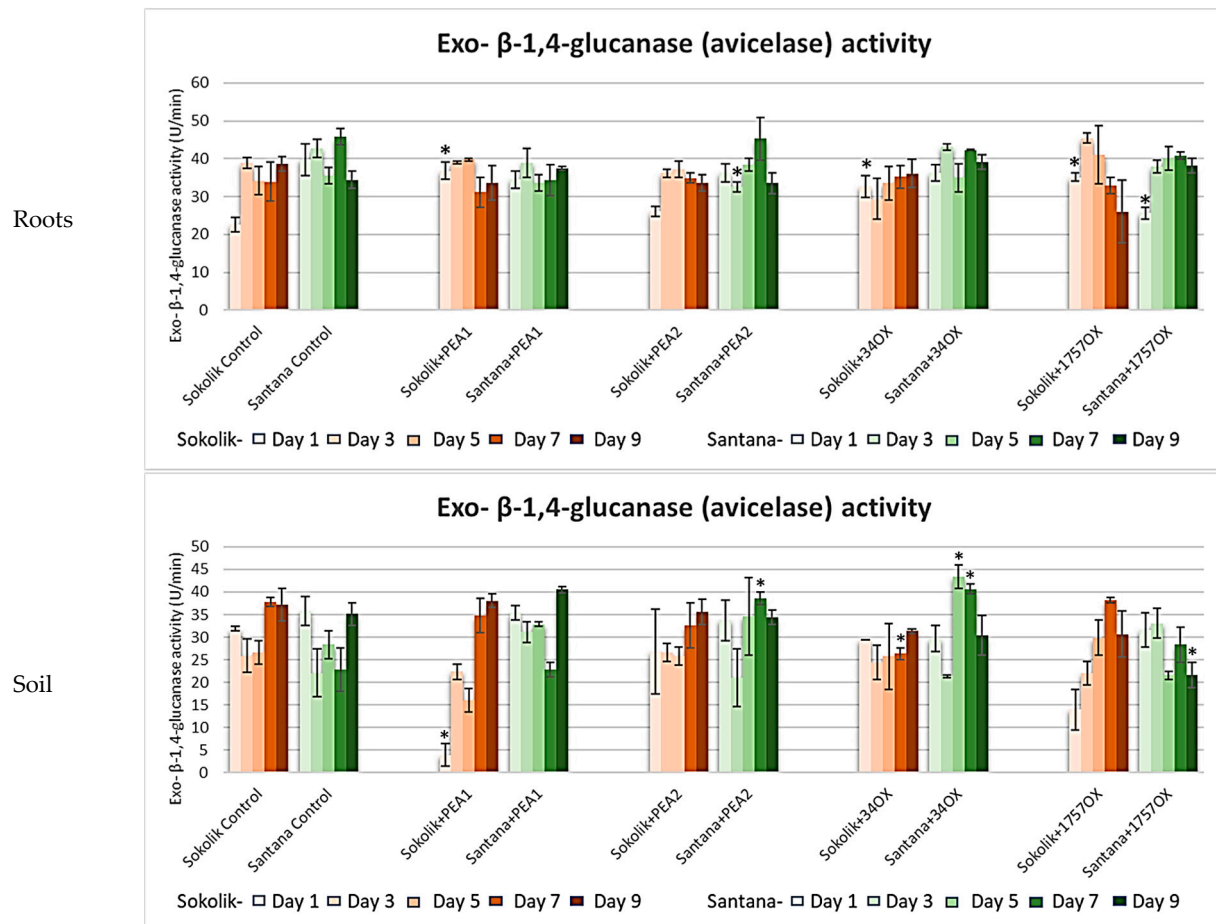

**Figure S5.** Exo  $\beta$ -1, 4-glucanase (Avicelase) activity obtained from roots and soil of Sokolik and Santana infected with PEA1, PEA2, 34 OX, 1757 OX and control. Error bar represents standard error. \*Statistically significant ( $p < 0.05$ ).
